# Supplementary material for: Phage Engineering for Targeted Multidrug-Resistant Escherichia coli
Source: MDPI journal article supplement (doi:10.3390/ijms24032459), 2023-01-27

**Figure S1 Whole-genome comparison analysis. (A)** Genome comparison between PHB20 and other phages with higher homology of nucleotide sequence. Each arrow indicated an annotated ORF. The color intensity is proportional to the sequence homology. **(B)** Primers were designed for phage tail fibers.

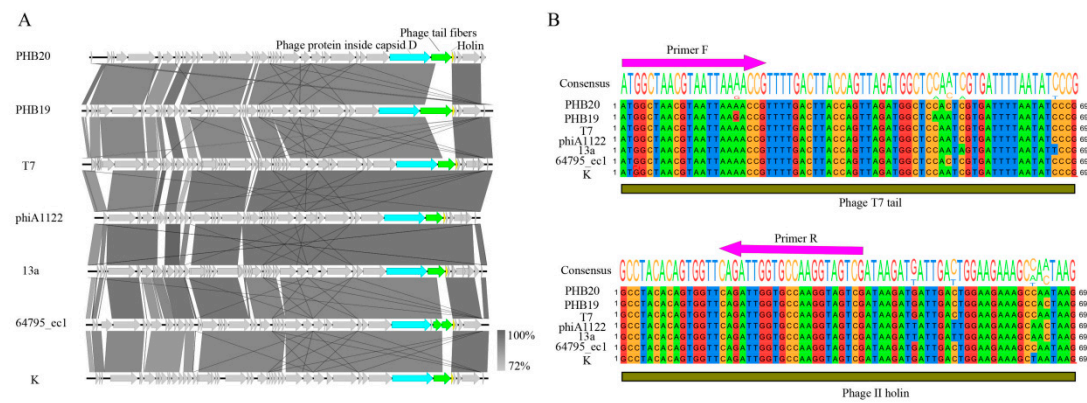

Supplement: s1 [file s1]
