# Supplementary material for: Phage Engineering for Targeted Multidrug-Resistant Escherichia coli
Source: Int J Mol Sci. 2023 Jan 27;24(3):2459. doi: 10.3390/ijms24032459 (PMC10004113; doi:10.3390/ijms24032459)
Supplement: Supplementary file 1 [file ijms-24-02459-s001.zip › Excel S1.xlsx]

## Sheet: Sheet1
phage tail fiber genes	base sequence
P1	ATGGCTAACGTAATTAAAACCGTTTTGACTTACCAGTTAGATGGCTCCAATCGTGATTTTAATATCCCGTTTGAGTATCTAGCCCGTAAGTTCGTAGTAGTAACCCTTATTGGCGTAGACCGCAAGGTCCTTACGATTAATGCAGACTACCGTTTTGCTACGCGTACTACCATCTCACTTACCAAGGCTTGGGGTCCAGCGGATGGATACACTACCATCGAGTTACGCCGAGTAACCTCCACAACCGACCGATTGGTTGACTTTACGGATGGTTCAATCCTCCGTGCGTATGACCTTAACGTCGCTCAGATTCAAACGATGCACGTAGCGGAAGAGGCCCGTGACCTCACTGCTGATACCATAGGTGTCAATAATGATGGTCATTTGGATGCTCGTGGT…
P2	ATGGCTAACGTAATTAAGACCGTTTTGACTTACCAGTTAGATGGTTCGAATCGAGATTTTAACATCCCGTTTGAATATCTAGCCCGTAAGTTTGTAGTGGTAACTCTCATTGGTGTTGACCGTAAGGTCCTCACACTCAATACGGATTATCGCTTTGCTACGCGTACTACTATCTCGCTAACCAAATCTTGGGGGCCTGCGGATGGTTACACTACTATTGAGCTACGCCGAGTAACCTCCACGACTGACCGTCTTGTTGACTTTACGGATGGCTCAATCCTGCGTGCTTATGACCTTAACGTGGCTCAGATTCAGACTATGCATGTGGCAGAAGAGGCCCGTGACTTAACTGCGGATACCATTGGTGTCAACAACGATGGTCACTTGGATGCCCGTGGT…
P3	ATGGCTAACGTAATTAAGACCGTTTTGACTTACCAGTTGGATGGCTCAACTCGCGACTTTAATATCCCGTTTGAGTATCTAGCTCGTAAGTTTGTAGTGGTAACTCTCATTGGGGTTGACCGTAAGGTCCTCACGCTCAATACAGATTATCGCTTTGCTACACGTACTACTATCTCTCTGACCAAGGCTTGGGGTATATCCGATGGGTACACTACTATTGAGCTACGCCGAGTAACCTCCACGACTGACCGTCTGGTTGACTTTACGGATGGTTCAATCCTGCGTGCGTATGACCTTAACGTGGCTCAGATTCAGACTATGCATGTAGCAGAAGAGGCCCGTGACTTAACTGCTGATACCATTGGTGTCAACAATGACGGTCACTTGGATGCCCGTGGT…
P4	ATGGCTAACGTAATTAAGACCGTTTTGACTTACCCGTTAGATGGCTCCACTCGTGATTTTAATATCCCGTTTGAGTATCTAGCCCGTAAGTTCGTAGTGGTAACTCTTATTGGTGTTGACCGTAAGGTCCTTACACTCAATACAGATTATCGCTTTGCTACGCGCACTACTATCTCACTGACCAAATCTTGGGGTACAGCTGATGGCTACACGACCATCGAGTTGCGCCGAGTAACCTCCACGACCGACCGCTTGGTTGACTTTACGGATGGTTCAATCCTCCGTGCGTATGACCTTAACGTGGCTCAGATTCAGACTATGCATGTGGCAGAAGAGGCCCGTGACTTAACTGCGGATACCATTGGTGTCAACAATGATGGTCACTTGGATGCCCGTGGT…
P5	ATGGCTAACGTAATTAAAACCGTTTTGACTTACCAGTTAGATGGCTCCAATCGTGATTTTAATATCCCGTTTGAGTATCTAGCCCGTAAGTTCGTAGTGGTAACTCTTATTGGTGTAGACCGAAAGGTCCTTACGATTAATACAGACTATCGTTTTGCTACACGTACTACTATCTCTCTGACAAAGGCTTGGGGTCCAGCCGATGGCTACACGACCATCGAGTTACGTCGAGTAACCTCCACTACCGACCGATTGGTTGACTTTACGGATGGTTCAATCCTCCGCGCGTATGACCTTAACGTCGCTCAGATTCAAACGATGCACGTAGCGGAAGAGGCCCGTGACCTCACTACGGATACTATCGGTGTCAATAACGATGGTCACTTGGATGCTCGTGGT…
P6	GGGGGGGGCTGCGGTCGACGATTGGCTAACGTAATTAAGACCGTTTTGACTTACCAGTTGGATGGCTCAACTCGCGACTTTAATATCCCGTTTGAGTATCTAGCTCGTAAGTTTGTAGTGGTAACTCTCATTGGGGTTGACCGTAAGGTCCTCACGCTCAATATAGATTATCGCTTTGCTACACGTACTACTATCTCTCTGACCAAGGCTTGGGGTATATCCGATGGGTACACTACTATTGAGCTACGCCGAGTAACCTCCACGACTGACCGTCTGGTTGACTTTACGGATGGCTCAATCCTGCGTGCGTATGACCTTAACGTGGCTCAGATTCAGACTATGCATGTAGCAGAAGAGGCCCGTGACTTAACTGCTGATACCATTGGTGTCAACAATGAC…
P7	ATGGCTAACGTAATTAAGACCGTTTTGACTTACCAGTTGGATGGCTCAACTCGCGACTTTAATATCCCGTTTGAGTATCTAGCTCGTAAGTTTGTAGTGGTAACTCTCATTGGGGTTGACCGTAAGGTCCTCACGCTCAATACAGATTATCGCTTTGCTACACGTACTACTATCTCTCTGACCAAGGCTTGGGGTATATCCGATGGGTACACTACTATTGAGCTACGCCGAGTAACCTCCACGACTGACCGTCTGGTTGACTTTACGGATGGCTCAATCCTGCGTGCGTATGACCTTAACGTGGCTCAGATTCAGACTATGCATGTAGCAGAAGAGGCCCGTGACTTAACTGCTGATACCATTGGTGTCAACAATGACGGTCACTTGGATGCCCGTGGT…
P8	TACGAAGGGTCCTGCCAGCTTGCATGCCTGCAGGTCGACGATTATGGCTAACGTAATTAAGACCGTTTTAACTTACCCATTAGACGGCTCAACTCGGGACTTTAATATCCCGTTTGAGTATCTAGCCCGTAAGTTCGTAGTGGTAACACTTATCGGTGTAGACCGTAAGGTCCTTACACTTAATACAGACTATCGCTTTGCCACGCGAACTACCATCTCTCTGACCAAGGCTTGGGGTTACGCCGATGGTTACACAAGCATTGAGATACGCCGAGTAACCTCAACTACAGACCGATTGGTTGACTTTACGGATGGCTCAATCCTCCGTGCGTATGACCTTAACGTTGCCCAGATTCAAACAATGCATGTAGCCGAAGAAGCTCGCGACCTAACCGCTGA…
P9	GAACGGAGGGGTCTGCCAGCTTGCATGCCTGCAGGTCGACGATTATGGCTAACGTAATTAAGACCGTTTTGACTTACCAGCTAGATGGCTCCAATCGTGATTTTAATATTCCGTTTGAGTATCTAGCCCGTAAGTTCGTAGTGGTGACTCTTATTGGTGTAGACCGTAAGGTCCTCACGATTAATACAGACTATCGCTTTGCTACACGTACTACCATCTCTCTGACCAAGGCTTGGGGTCCAGCCGATGGCTACACGACCATCGAGTTGCGCCGAGTAACCTCCACGACCGACCGATTGGTTGACTTTACGGACGGCTCAATCCTCCGTGCGTATGACCTTAACGTCGCTCAGATTCAAACGATGCACGTAGCGGAAGAGGCCCGTGACCTAACTGCGG…
P10	ATGGCTAACGTAATTAAAACCGTTTTGACTTACCCGTTAGATGGCTCCACTCGTGATTTTAATATCCCGTTTGAGTATCTAGCCCGTAAGTTCGTAGTGGTAACTCTTATTGGCGTAGACCGTAAGGTCCTTACGCTTAATACAGACTATCGCTTTGCTACACGTACTACCATCTCTCTGACCAAGGCTTGGGGTACATCCGATGGGTACACGACCATCGAGTTACGTCGAGTAACCTCCACGACAGACCGCTTGGTTGATTTTACGGACGGTTCAATACTCCGTGCGTATGACCTTAACGTTGCTCAGATTCAAACGATGCATGTAGCGGAGGAGGCGCGTGACCTTACTGCTGATACAATCGGTGTCAATAGTGACGGTCACTTGGATGCCCGTGGT…
P11	ATGGCTAACGTAATTAACACCGTTTTGACTTACCCGTTAGATGGCTCCACTCGTGATTTTAATATCCCGTTTGAGTATCTAGCCCGTAAGTTCGTAGTGGTAACTCTTATTGGTGTTGACCGTAAGGTCCTTACACTCAATACAGATTATCGCTTTGCTACGCGCACTACTATCTCGCTGACCAAATCTTGGGGTCCGGCTGATGGCTACACGACCATCGAGTTGCGCCGAGTAACCTCCACGACAGACCGCTTGGTTGACTTTACGGATGGTTCAATCCTGCGTGCGTATGACCTTAACGTAGCGCAGATTCAGACTATGCATGTGGCAGAAGAGGCCCGTGACTTAACTGCGGATACCATTGGTGTCAACAACGATGGTCACTTGGATGCTCGTGGT…
P12	GGGGTTAACACGGAGTGCCAGCTTGCATGCCTGCAGGTCGACGATTATGGCTAACGTAATTAAAACCGTTTTGACTTACCAGTTAGATGGCTCCACTCGTGATTTTAATATCCCGTTTGAGTATCTAGCCCGTAAGTTCGTAGTGGTAACTCTTATTGGTGTAGACCGTAAGGTCCTTACGCTTAATACAGACTATCGCTTTGCTACACGTACTACCATCTCACTGACTAAGGCTTGGGGTCCATCCGATGGCTACACGACCATTGTGTTACGCCGAGTAACCTCCACGACCGACCGCTTGGTTGACTTTACGGACGGCTCAATCCTCCGTGCGTATGACCTTAACGTTGCTCAGATTCAAACGATGCACGTAGCGGAGGAGGCGCGCGACCTGACTGC…
P13	ATGGCTAACGTAATTAAAACCGTTTTGACTTACCAGTTAGATGGCTCCAATCGTGATTTTAATATCCCGTTTGAGTATCTAGCCCGTAAGTTCGTAGTAGTAACCCTTATTGGCGTAGACCGCAAGGTCCTTACGATTAATGCAGACTACCGTTTTGCTACGCGTACTACCATCTCACTTACCAAGGCTTGGGGTCCAGCGGATGGATACACTACCATCGAGTTACGCCGAGTAACCTCCACAACCGACCGATTGGTTGACTTTACGGATGGTTCAATCCTCCGTGCGTATGACCTTAACGTCGCTCAGATTCAAACGATGCACGTAGCGGAAGAGGCCCGTGACCTCACTGCTGATACCATAGGTGTCAATAATGATGGTCATTTGGATGCTCGTGGT…
P14	ATGGCTAACGTAATTAAAACCGTTTTGACTTACCCGTTAGATGGCTCAAATCGTGATTTTAATATTCCGTTTGAGTATCTAGCCCGTAAGTTCGTAGTGGTAACTCTTATTGGTGTTGACCGTAAGGTCCTTACACTCAATACAGATTATCGCTTTGCTACGCGCACTACTATCTCGCTGACAAAATCTTGGGGTACAGCTGATGGCTACACGACCATCGAGTTACGCCGAGTAACCTCCACGACCGACCGCTTGGTTGACTTTACGGACGGCTCAATCCTCCGTGCGTATGACCTTAACGTTGCTCAGATTCAAACGATGCACGTAGCGGAGGAGGCGCGTGACCTGACTGCTGATACAATCGGTGTCAATAATAACGGTCACTTGGATGCCCGTGGT…
P15	ATGGCTAACGTAATTAAAACCGTTTTGACTTACCAGTTAGATGGCTCCAATCGTGATTTTAATATCCCGTTTGAGTATCTAGCCCGTAAGTTCGTAGTAGTAACCCTTATTGGCGTAGACCGCAAGGTCCTTACGATTAATGCAGACTACCGTTTTGCTACGCGTACTACCATCTCACTTACCAAGGCTTGGGGTCCAGCGGATGGATACACTACCATCGAGTTACGCCGAGTAACCTCCACAACCGACCGATTGGTTGACTTTACGGATGGTTCAATCCTCCGTGCGTATGACCTTAACGTCGCTCAGATTCAAACGATGCACGTAGCGGAAGAGGCCCGTGACCTCACTACTGATACCATAGGTGTCAATAATGATGGTCATTTGGATGCTCGTGGT…
P16	ATGGCTAACGTAATTAAAACCGTTTTGACTTACCAGTTAGATGGCTCCACTCGTGATTTTAATATCCCGTTTGAGTATCTAGCCCGTAAGTTCGTAGTGGTAACTCTTATTGGTGTAGACCGTAAGGTCCTTACGCTTAATACAGACTATCGCTTTGCTACACGTACTACCATCTCACTGACTAAGGCTTGGGGTCCATCCGATGGCTACACGACCATTGTGTTACGCCGAGTAACCTCCACGACCGACCGCTTGGTTGACTTTACGGACGGCTCAATCCTCCGTGCGTATGACCTTAACGTTGCTCAGATTCAAACGATGCACGTAGCGGAGGAGGCGCGCGACCTGACTGCTGATACAATCGGTGTCAATAATGACGGTCACTTGGATGCCCGTGGT…
P17	CCTAGAAAAATGATTACGAATTCGAGCTCGGTACCCGGGGATCCTCTAGAGATTATGGCTAACGTAATTAACACCGTTTTGACTTACCAGTTAGATGGCTCCAATCGTGATTTTAATATCCCGTTTGAGTATCTAGCCCGTAAGTTCGTAGTGGTAACTCTTATTGGTGTAGACCGCAAGGTCCTTACGATTAATACAGACTACCGCTTTGCTACGCGTACTACCATCTCACTGACCAAGGCTTGGGGTACAGCTGATGGCTACACGACCATCGAGTTGCGCCGAGTAACCTCCACGACCGACCGCTTGGTTGACTTTACGGACGGCTCAATCCTCCGTGCGTATGACCTCAACGTTGCTCAGATTCAAACGATGCACGTAGCGGAAGAGGCCCGTGAC…
P18	ATGGCTAACGTAATTAAAACCGTTTTGACTTACCAGTTAGATGGCTCCAATCGTGATTTTAATATCCCGTTTGAGTATCTAGCCCGTAAGTTCGTAGTAGTAACCCTTATTGGCGTAGACCGCAAGGTCCTTACGATTAATGCAGACTACCGTTTTGCTACGCGTACTACCATCTCACTTACCAAGGCTTGGGGTCCAGCGGATGGATACACTACCATCGAGTTACGCCGAGTAACCTCCACAACCGACCGATTGGTTGACTTTACGGATGGTTCAATCCTCCGTGCGTATGACCTTAACGTCGCTCAGATTCAAACGATGCACGTAGCGGAAGAGGCCCGTGACCTCACTGCTGATACCATAGGTGTCAATAATGATGGTCATTTGGATGCTCGTGGT…
P19	ATGGCTAACGTAATTAAAACCGTTTTGACTTACCAGTTAGATGGCTCCAATCGTGATTTTAATATCCCGTTTGAGTATCTAGCCCGTAAGTTCGTAGTGGTAACTCTTATTGGTGTAGACCGAAAGGTCCTTACGATTAATACAGACTATCGCTTTGCTACACGTACTACTATCTCTCTGACAAAGGCTTGGGGTCCAGCCGATGGCTACACGACCATCGAGTTACGTCGAGTAACCTCCACTACCGACCGATTGGTTGACTTTACGGATGGTTCAATCCTCCGCGCGTATGACCTTAACGTCGCTCAGATTCAAACGATGCACGTAGCGGAAGAGGCCCGTGACCTCACTACGGATACTATCGGTGTCAATAACGATGGTCACTTGGATGCTCGTGGT…
P20	ATGGCTAACGTAATTAAGACCGTTTTGACTTACCAGTTAGATGGTTCGAATCGAGATTTTAACATCCCGTTTGAATATCTAGCCCGTAAGTTTGTAGTGGTAACTCTCATTGGTGTTGACCGTAAGGTCCTCACACTCAATACGGATTATCGCTTTGCTACGCGTACTACTATCTCGCTAACCAAATCTTGGGGGCCTGCGGATGGTTACACTACTATTGAGCTACGCCGAGTAACCTCCACGACTGACCGTCTTGTTGACTTTACGGATGGCTCAATCCTGCGTGCTTATGACCTTAACGTGGCTCAGATTCAGACTATGCATGTGGCAGAAGAGGCCCGTGACTTAACTGCGGATACCATTGGTGTCAACAACGATGGTCACTTGGATGCCCGTGGT…
P21	ATGGCTAACGTAATTAAAACCGTTTTGACTTACCAGTTAGATGGCTCCAATCGTGATTTTAATATCCCGTTTGAGTATCTAGCCCGTAAGTTCGTAGTGGTAACTCTTATTGGTGTAGACCGAAAGGTCCTTACGATTAATACAGACTATCGCTTTGCTACACGTACTACTATCTCTCTGACAAAGGCTTGGGGTCCAGCCGATGGCTACACGACCATCGAGTTACGTCGAGTAACCTCCACTACCGACCGATTGGTTGACTTTACGGATGGTTCAATCCTCCGCGCGTATGACCTTAACGTCGCTCAGATTCAAACGATGCACGTAGCGGAAGAGGCCCGTGACCTCACTACGGATACTATCGGTGTCAATAACGATGGTCACTTGGATGCTCGTGGT…
P22	ATGGCTAACGTAATTAAAACCGTTTTGACTTACCAGTTAGATGGCTCCAATCGTGATTTTAATATCCCGTTTGAGTATCTAGCCCGTAAGTTCGTAGTGGTAACTCTTATTGGTGTAGACCGAAAGGTCCTTACGATTAATACAGACTATCGCTTTGCTACACGTACTACTATCTCTCTGACAAAGGCTTGGGGTCCAGCCGATGGCTACACGACCATCGAGTTACGTCGAGTAACCTCCACTACCGACCGATTGGTTGACTTTACGGATGGTTCAATCCTCCGCGCGTATGACCTTAACGTCGCTCAGATTCAAACGATGCACGTAGCGGAAGAGGCCCGTGACCTCACTACGGATACTATCGGTGTCAATAACGATGGTCACTTGGATGCTCGTGGT…
P23	ATGGCTAACGTAATTAAAACCGTTTTGACTTACCAGTTAGATGGCTCCAATCGTGATTTTAATATCCCGTTTGAGTATCTAGCCCGTAAGTTCGTAGTGGTAACTCTTATTGGTGTAGACCGAAAGGTCCTTACGATTAATACAGACTATCGCTTTGCTACACGTACTACTATCTCTCTGACAAAGGCTTGGGGTCCAGCCGATGGCTACACGACCATCGAGTTACGTCGAGTAACCTCCACTACCGACCGATTGGTTGACTTTACGGATGGTTCAATCCTCCGCGCGTATGACCTTAACGTCGCTCAGATTCAAACGATGCACGTAGCGGAAGAGGCCCGTGACCTCACTACGGATACTATCGGTGTCAATAACGATGGTCACTTGGATGCTCGTGGT…
P24	ATGGCTAACGTAATTAAAACCGTTTTGACTTACCAGTTAGATGGCTCCAATCGTGATTTTAATATCCCGTTTGAGTATCTAGCCCGTAAGTTCGTAGTGGTAACTCTTATTGGTGTAGACCGAAAGGTCCTTACGATTAATACAGACTATCGCTTTGCTACACGTACTACTATCTCTCTGACAAAGGCTTGGGGTCCAGCCGATGGCTACACGACCATCGAGTTACGTCGAGTAACCTCCACTACCGACCGATTGGTTGACTTTACGGATGGTTCAATCCTCCGCGCGTATGACCTTAACGTCGCTCAGATTCAAACGATGCACGTAGCGGAAGAGGCCCGTGACCTCACTACGGATACTATCGGTGTCAATAACGATGGTCACTTGGATGCTCGTGGT…
P25	ATGGCTAACGTAATTAAAACCGTTTTGACTTACCAGTTAGATGGCTCCAATCGTGATTTTAATATCCCGTTTGAGTATCTAGCCCGTAAGTTCGTAGTAGTAACCCTTATTGGCGTAGACCGCAAGGTCCTTAGCATTAATGCAGACTACCGTTTTGCTACGCGTACTACCATCTCGCTTACCAAGGCTTGGGGTCCAGCGGATGGATACACTACCATCGAGTTACGCCGAGTAACCTCCACAACCGACCAATTGGTTGACTTTACGGATGGTTCAATCCTCCGTGCGTATGACCTTAACGTCGCTCAGATTCAAACGATGCACGTAGCGGAAGAGGCCCGTGACCTCACTGCTGATACCATAGGTGTCAATAATGATGGTCATTTGGATGCTCGTGGT…
P26	ATGGCTAACGTAATTAAAACCGTTTTGACTTACCAGTTAGATGGCTCCAATCGTGATTTTAATATCCCGTTTGAGTATCTAGCCCGTAAGTTCGTAGTGGTAACTCTTATTGGTGTAGACCGAAAGGTCCTTACGATTAATACAGACTATCGCTTTGCTACACGTACTACTATCTCTCTGACAAAGGCTTGGGGTCCAGCCGATGGCTACACGACCATCGAGTTACGTCGAGTAACCTCCACTACCGACCGATTGGTTGACTTTACGGATGGTTCAATCCTCCGCGCGTATGACCTTAACGTCGCTCAGATTCAAACGATGCACGTAGCGGAAGAGGCCCGTGACCTCACTGCGGATACTATCGGTGTCAATAACGATGGTCACTTGGATGCTCGTGGT…
P27	ATGGCTAACGTAATTAAAACCGTTTTGACTTACCAGTTAGATGGCTCCAATCGTGATTTTAATATCCCGTTTGAGTATCTAGCCCGTAAGTTCGTAGTAGTAACCCTTATTGGCGTAGACCGCAAGGTCCTTACGATTAATGCAGACTACCGTTTTGCTACGCGTACTACCATCTCACTTACCAAGGCTTGGGGTCCAGCGGATGGATACACTACCATCGAGTTACGCCGAGTAACCTCCACAACCGACCGATTGGTTGACTTTACGGATGGTTCAATCCTCCGTGCGTATGACCTTAACGTCGCTCAGATTCAAACGATGCACGTAGCGGAAGAGGCCCGTGACCTCACTGCTGATACCATAGGTGTCAATAATGATGGTCATTTGGATGCTCGTGGT…
P28	ATGGCTAACGTAATTAAAACCGTTTTGACTTACCAGTTAGATGGCTCCAATCGTGATTTTAATATCCCGTTTGAGTATCTAGCCCGTAAGTTCGTAGTGGTAACTCTTATTGGTGTAGACCGAAAGGTCCTTACGATTAATACAGACTATCGCTTTGCTACACGTACTACTATCTCTCTGACAAAGGCTTGGGGTCCAGCCGATGGCTACACGACCATCGAGTTACGTCGAGTAACCTCCACTACCGACCGATTGGTTGACTTTACGGATGGTTCAATCCTCCGCGCGTATGACCTTAACGTCGCTCAGATTCAAACGATGCACGTAGCGGAAGAGGCCCGTGACCTCACTAAGGATACTATCGGTGTCAATAACGATGGTCACTTGGATGCTCGTGGT…
P29	ATGGCTAACGTAATTAAAACCGTTTTGACTTACCAGTTAGATGGCTCCAATCGTGATTTTAATATCCCGTTTGAGTATCTAGCCCGTAAGTTCGTAGTGGTAACTCTTATTGGTGTAGACCGAAAGGTCCTTACGATTAATACAGACTATCGCTTTGTTACACGTACTACTATCTCTCTGACAAAGGCTTGGGGTCCAGCCGATGGTTACACGACCATCGAGTTACGTCGAGTAACCTCCACTACCGATCGATTGGTTGACTTTACGGATGGTTCAATCCTCCGCGCGTATGACCTTAACGTCGCTCAGATTCAAACGATGCACGTAGCGGAAGAGGCCCGTGACCTCACTACGGCTACTATCGGTGTCAATAACGATGGTCACTTGGATGCTCGTGGT…
P30	ATGGCTAACGTAATTAAAACCGTTTTGACTTACCAGTTAGATGGCTCCAATAGTGATTTTAATATTCCGTTTGAGTATCTAGCCCGTAAGTTCGTAGCGGTAACTCTTATTGGCGTAGACCGCAAGGTCCTTACGATTAATACAGACTACCGTTTTGCTACTCGCACCACTATCTCTCTTACAAAGGCTTGGGGTCCAGCCGATGGCTACACGACCATCGAGTTACGTCGAGTAACATCCACGACCGACAGATTGGTTGACTTTACGGACGGCTCAATCCTCCGTGCGTATGACCTTAACGTAGCTCAGATTCAAACGATTCACGTAGCGGAAGAGGCCCGTGACCTCACTGCGGATACTATCGGTGTCAATAACGATGGTCACTTGGATGCTCGTGGT…
